# Distinct gaits of self-propelled quadriflagellate microswimmers

Dario Cortese and Kirsty Y. Wan\*

*Living Systems Institute & College of Engineering, Mathematics and Physical Sciences  
University of Exeter, Stocker Road, Exeter, EX4 4QD, United Kingdom*

(Dated: May 10, 2022)

Legged animals often coordinate multiple appendages for both underwater and terrestrial locomotion. Quadrupeds in particular, change their limb movements dynamically to achieve a number of gaits, such as the gallop, trot, and pronk. Surprisingly, micron-sized unicellular algae are also capable of coordinating four flagella to produce microscale versions of these gaits for swimming. Here we present a fully-3D model of a quadriflagellate microswimmer comprising five beads and systematically investigate the effect of gait on swimming dynamics, propulsion speed, efficiency, and induced flow patterns. We find that by changing gait alone, distinct motility patterns emerge from the same basic microswimmer design. Our findings suggest that different species of morphologically-similar microorganisms (e.g. with identical number and placement of appendages) evolved distinct flagellar coordination patterns as a consequence of different ecological drivers. By comparing the flagella-induced flows in terms of volumetric clearance rate, we further explore the implications of distinct gaits for single-cell dispersal, feeding, and predator-avoidance.

## I. INTRODUCTION

Biological microswimmers display a variety of species-specific locomotor behaviours. In motile unicellular algae, diverse ciliary or flagellar beat patterns result in different microscale swimming gaits, some of which are comparable to those of animals with analogous limb positioning. A single species can perform multiple swimming gaits depending on environmental conditions, or even switch dynamically between them. For example, the model organism *Chlamydomonas* swims by beating its two flagella in a quasi-synchronous breaststroke pattern; however, losses of synchrony can stochastically trigger a transient second gait ('phase slip') in which flagella beat out-of-phase [1, 2]. Quadriflagellates, algae bearing four flagella, are another commonly-occurring configuration of microswimmer, abundant in many freshwater and marine habitats [3–5]. Their four appendages can have equal lengths and beat patterns, or they may have different lengths, beat patterns, and functions, depending on the stage of basal-body maturation [6]. It has been shown recently that quadriflagellate gaits can be classified by comparing them to the movement of quadrupeds [7]. Gaits such as the trot, pronk, gallop have all been observed, in which the relative phase relationships between the beating flagella can be confirmed by high-speed imaging [8].

At the microscale, what is the rationale behind selecting a specific gait in a given situation, and what are the advantages and drawbacks of individual gaits? Moreover, why do different species preferentially select for one gait over another? The answer deviates significantly from our intuitions associated with macroscopic vertebrate locomotion [9]. For instance, *Pyramimonas parkeae* swims using a 'trot' gait, achieving an average speed of up to  $400 \mu\text{m/s}$ , several times faster than its sister species *Pyramimonas tetra-rhynchus*, which largely swims using the 'pronk' gait [7, 10]. In terms of cell size and shape, both species comprise obovate or oblong cells of approximately  $20 \mu\text{m}$  in length,  $10 \mu\text{m}$  in width, and four equal-length, front-mounted flagella ( $10 - 15 \mu\text{m}$ ), arranged in a cruciate pattern (Fig. 1A). Despite their near-identical body and flagella morphology, different quadriflagellate swimmers nonetheless exhibit distinct motility characteristics [10]. Therefore, we ask if and how gait alone can influence swimming dynamics.

Any microswimmer's ability to swim depends strongly on its intrinsic shape and sequence of shape deformations. Many simple microswimmer designs have been studied extensively using theoretical

---

\* For correspondence: [k.y.wan2@exeter.ac.uk](mailto:k.y.wan2@exeter.ac.uk)

46 or computational approaches, such as Purcell’s three-link swimmer [11], the linear three-bead Najafi-  
47 Golestanian swimmer [12], the two-sphere pushme-pullyou swimmer [13], a *Chlamydomonas-like* pla-  
48 nar triangular swimmer [14], and many others. Another swimmer composed of a I-shaped frame and  
49 four rotating disks (termed Quadroar), was shown to be capable of 3D manoeuvrability [15]. Unlike  
50 in experiments, simulation parameters can be readily varied to evaluate how shape and gait influence  
51 propulsion efficacy, or to identify the existence of optimal gaits [16]. To date, only some of these  
52 systems have been realised experimentally, for example using colloids or beads that are driven by  
53 optical tweezers or external magnetic fields [17–19]. In-depth studies of such analytically tractable  
54 microswimmers will not only help us understand the biological propulsion mechanisms of extant mi-  
55 croorganisms, but also inform and improve the design and control of artificial or robotic swimmers  
56 that are capable of effective navigation at low-Reynolds numbers.

57 In this article, we systematically explore the dependence of microswimming on gait by developing  
58 a novel *in silico* model of a quadriflagellate alga (Fig. 1). We compare a range of quadriflagellate  
59 gaits by solving the appropriate zero-Reynolds number hydrodynamics equations, and compute the  
60 resulting trajectories and both the near and far-field flow patterns.

61 We note that when path-sampling the trajectory history of live cells, stochastic transitions between  
62 different modes or gaits can occur due to biological noise and environmental perturbations, and this  
63 can significantly impact the overall swimming trajectory [20–22]. For simplicity, we shall neglect gait-  
64 switching dynamics here and focus only on the consequences of a sustained, deterministic gait. We  
65 will also discuss our results in light of available biological data, as well as measurements from a recent  
66 macroscopic ( $\mathcal{O}(10)\text{cm}$ ) robophysical model ([10]) of quadriflagellate algae.

67 The paper is organised as follows. We begin by introducing the quadriflagellate model, and asso-  
68 ciated equations of motion (Section II). We then compare the three-dimensional flow fields produced  
69 by such a swimmer, for a variety of prescribed flagellar actuation gaits (Section III). In Section IV,  
70 we consider the impact of these flows on the free swimming trajectories, and extend the model to  
71 explore the role of asymmetries in the either the flagellar geometry or the beat frequency (Section V).  
72 Finally, in Section VI, we explore possible functional relationships between gait and induced flows for  
73 processes unrelated to swimming, such as enhanced feeding, fluid mixing, or cloaking from predators.

## 74 II. MODEL FORMULATION

75 Our model quadriflagellate consists of five beads immersed in an incompressible Newtonian fluid,  
76 interacting hydrodynamically at zero-Reynolds number. The cell body has radius  $a_0$  and is located  
77 at  $\mathbf{r}_0$ . The four flagella are modelled by smaller beads of radius  $a \ll a_0$ , located at the centers of  
78 drag of each flagellum  $\mathbf{r}_i$ ,  $i = 1 - 4$ . These are constrained to move along circular orbits of radius  
79  $R$ . The 4 orbits are fixed on a rigid triangular scaffold at rest with the body frame of reference  
80 (Fig. 1c), with dimensions  $\ell$  and  $h$ , and  $a \ll a_0 \ll h, \ell$ . Similar orbiting-bead models have been  
81 used to investigate hydrodynamic synchronisation of beating cilia in planar configurations [23–26].  
82 More recently, a three-dimensional, 3-bead version of this model helped reveal the origins of the  
83 superhelical swimming motion typical of the biflagellate alga *Chlamydomonas reinhardtii* [27]. The  
84 underlying motivation for such models comes from experimental evidence that flow-fields induced by  
85 freely-swimming *Chlamydomonas* cells are well-described by just three Stokeslets [28].

86 Similar to the biflagellate case, here we also allow for out-of-plane swimming by tilting the single-  
87 flagella orbital planes - here, flagellar beads produce the axial rotation needed for helical swimming  
88 (Fig. 11, inset). Each flagellar bead is associated with an independent tilt angle  $\beta_i$ ,  $i = 1 - 4$ . All  
89 four flagella have the same tilt, unless otherwise stated (e.g. Fig. 5).

90 The beads are assumed to move along circular orbits centred at

$$91 \mathbf{s}_i = \begin{cases} \mathbf{r}_0 \mp \ell \mathbf{e}'_x + h \mathbf{e}'_z, & i = 1, 3 \\ \mathbf{r}_0 \mp \ell \mathbf{e}'_y + h \mathbf{e}'_z, & i = 2, 4 \end{cases} \quad (1)$$

92

93 When only two flagella are present (say flagella 1 and 3, and  $\beta_1 = \beta_3 = 0$ ), we recover the familiar  
94 in-plane breaststroke configuration.

95 The flagellar beads are located at  $\mathbf{r}_i = \mathbf{s}_i + R\mathbf{n}_i$  with

$$96 \quad \mathbf{n}_i = \begin{cases} \pm \cos \varphi_i \mathbf{e}'_x \pm \sin \beta \sin \varphi_i \mathbf{e}'_y + \cos \beta \sin \varphi_i \mathbf{e}'_z, & i = 1, 3 \\ \pm \cos \varphi_i \mathbf{e}'_y \pm \sin \beta \sin \varphi_i \mathbf{e}'_x + \cos \beta \sin \varphi_i \mathbf{e}'_z, & i = 2, 4 \end{cases} \quad (2)$$

98 The body axes  $\{\mathbf{e}'_i\}$  transform to the lab frame  $\{\mathbf{e}_i\}$  via Euler angles  $\boldsymbol{\theta} = (\theta_1, \theta_2, \theta_3)$  (respectively, yaw, pitch and roll).

100 In many types of real and artificial cilia, the stroke speed is not perfectly uniform throughout the beat cycle [29, 30]. In order to implement a variable beat cycle along a perfectly circular orbit we allow the frequency to vary slightly during the cycle to mimic the asymmetric stroke pattern observed in most protist cilia. The inclusion of such a nonlinearity also ensures that the average stress pattern exerted by the cells on the fluid as measured in experiments is reproduced [28, 31]. This can be achieved by asymmetric force profiles [27, 32], or asymmetric (such as elliptical) trajectories [33]. Here, we set the beads to rotate with nonlinear phase dynamics described by

$$107 \quad \dot{\varphi}_i(t) = \omega_i - c \sin \varphi_i, \quad (3)$$

108 and beat frequency  $f_i = \dot{\varphi}_i/2\pi$  ( $c < \omega_i$ ). The four flagella beat with the same frequency, unless otherwise indicated. We note that in contrast to a previous formulation [27], the model quadriflagellate microswimmer is prescribed by the imposed gait kinematics, rather than by the tangential component of the flagellar forces.

112 Once the flagellar beating pattern  $\varphi_i(t)$  is set, the swimmer kinematics are fully described by the vector  $(x_0, y_0, z_0, \theta_1, \theta_2, \theta_3, \varphi_1, \varphi_2, \varphi_3, \varphi_4)$  and the parameters  $h, \ell, \beta, R, a_0, a$ . The swimmer has translational velocity  $\mathbf{V} = \dot{\mathbf{r}}_0$  and angular velocity  $\boldsymbol{\Omega}$ . The governing equations of the model can be derived from the force balance on each flagellar bead. Each flagellum is driven by a tangential force  $F_i^{(t)} \hat{\mathbf{t}}_i$  and it is balanced by the tangential component of the local hydrodynamic drag (given by

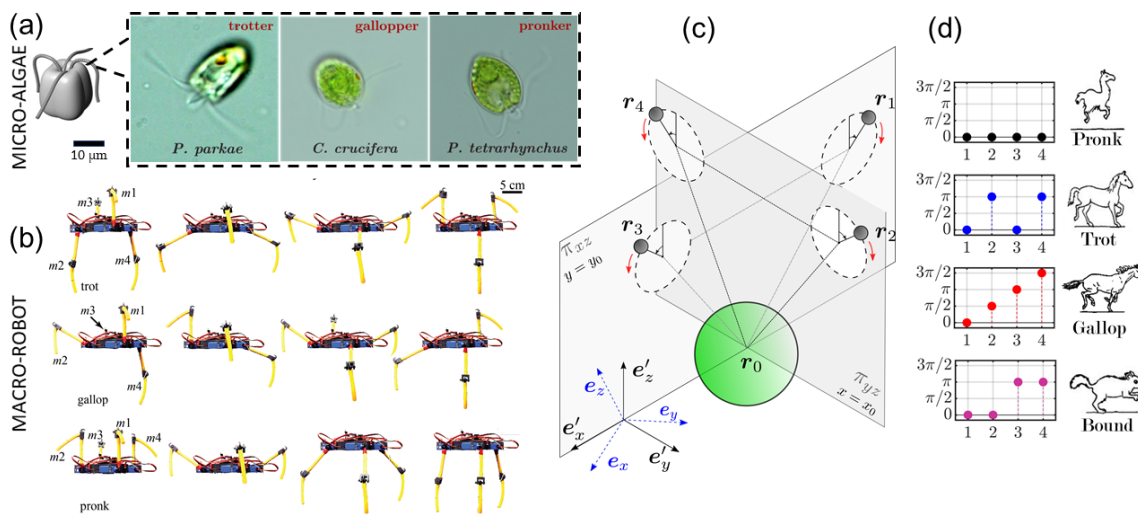

FIG. 1. (a) A stereotypical quadriflagellate cell has four front-mounted flagella (cilia) emanating from an anterior groove, where they assume a cruciate configuration. Different species of these algae assume distinct swimming gaits including the "pronk", "gallop", and "trot". (b) A macroscopic robot modelled on these algae can achieve different rates of self-propulsion at low-Reynolds number, depending on gait (image modified from [10]). (c) Here, we model a quadriflagellate microswimmer using a system of 5-beads, and systematically evaluate the swimming performance of each gait. The flagella beads rotate on circular orbits embedded in independent planes that may be tilted (the zero-tilt case is shown for simplicity). (d) Representations of these gaits in legged-animals.

117 Stokes' law),  $\mathbf{F}_i + \mathbf{F}_i^{(\text{drag})} = \mathbf{0}$ :

$$118 \quad \mathbf{F}_i^{(\text{drag})} \cdot \hat{\mathbf{t}}_i = -\gamma_i \hat{\mathbf{t}}_i \cdot [\dot{\mathbf{r}}_i - \mathbf{u}(\mathbf{r}_i)], \quad (4)$$

119 where the dot denotes a time derivative,  $\gamma_i = 6\pi\eta a_i$  and  $\eta$  is the dynamic viscosity of the fluid.  
 120 Because each bead is constrained to move on a circular trajectory (in the frame of the swimmer), the  
 121 tangential force balance becomes

$$122 \quad \dot{\mathbf{r}}_i \cdot \hat{\mathbf{t}}_i = \gamma_i^{-1} F_i^{(t)} + \hat{\mathbf{t}}_i \cdot \mathbf{u}(\mathbf{r}_i), \quad (5)$$

123 where the velocity flow field  $\mathbf{u}$  satisfies Stokes equation and the incompressibility condition:

$$124 \quad \eta \nabla^2 \mathbf{u} = \nabla p, \quad \nabla \cdot \mathbf{u} = 0 \quad (6)$$

125 If we consider each sphere in the far field of the others, the flow field at any point can be expressed,  
 126 at first order, using the Oseen approximation for hydrodynamic interactions between beads:

$$127 \quad \mathbf{u}(\mathbf{r}_i) = \sum_{j \neq i} \mathbf{G}(\mathbf{r}_{ij}) \cdot \mathbf{F}_j, \quad \text{with } \mathbf{G}(\mathbf{r}) = \frac{1}{8\pi\eta} (\mathbb{I} + \hat{\mathbf{r}} \otimes \hat{\mathbf{r}}) \quad (7)$$

129 where  $\mathbf{r}_{ij} = \mathbf{r}_i - \mathbf{r}_j$ . Similar relationships apply to the rotational motion of each bead. The dynamics  
 130 of the model are therefore governed by the following set of equations:

$$131 \quad \mathbf{V} = \sum_{j=1}^4 [\mathbf{G}(r_{0j}) - \gamma_0^{-1}] \cdot \mathbf{F}_j \quad (8)$$

$$132 \quad \dot{\mathbf{r}}_i = \frac{\mathbf{F}_i}{\gamma_i} + \sum_{\substack{j=1 \\ j \neq i}}^4 [\mathbf{G}(r_{ij}) - \mathbf{G}(r_{i0})] \cdot \mathbf{F}_j - \mathbf{G}(r_{i0}) \cdot \mathbf{F}_i \quad (i = 1, 2, 3, 4) \quad (9)$$

$$133 \quad \mathbf{\Omega} = \gamma_{0r}^{-1} \bar{\mathbf{T}}_0 = -\gamma_{0r}^{-1} \sum_{j=1}^4 \mathbf{T}_j, \quad (10)$$

135 where  $\gamma_{0r} = 8\pi\eta a_0^3$ .  $\mathbf{T}_i$  are the torques in the laboratory frame of reference, and  $\bar{\mathbf{T}}_i$  denotes the  
 136 intrinsic torques due to the rotation of the beads around an internal axis;  $a_0 \gg a$  implies  $\bar{\mathbf{T}}_0 \gg \bar{\mathbf{T}}_i$ .  
 137 The velocity of each bead is linked to the phase dynamics via  $\dot{\mathbf{r}}_i = \dot{\mathbf{r}}_0 + \mathbf{\Omega} \times \mathbf{r}_i + R\dot{\varphi}_i$ , thus coupling  
 138 equation (10) to (8)-(9).

139 We impose force- and torque-free conditions:

$$140 \quad \mathbf{F}_0 + \sum_{i=1}^4 \mathbf{F}_i = \mathbf{0}, \quad \bar{\mathbf{T}}_0 + \sum_{i=1}^4 \mathbf{T}_i = \mathbf{0}, \quad (11)$$

141 where  $\mathbf{T}_i = \mathbf{r}_i \times \mathbf{F}_i$ , and  $\bar{\mathbf{T}}_i$  is the intrinsic torque due to the  $i$ th sphere's rotation around an  
 142 internal axis. Equations (9)-(10) reduce to a set of 14 equations for unknowns  $(\mathbf{V}, \mathbf{\Omega}, \mathbf{F}_i)$ . The system  
 143 is solved numerically by an iterative process. First, morphological parameters are chosen to match  
 144 the geometrical properties of a typical quadriflagellate. All lengths are non-dimensionalised by  $\ell$   
 145 ( $= 10 \mu\text{m}$ , typical cell size), forces by the average tangential flagellar force  $F_0$  ( $= 30 \text{ pN}$ , typical force  
 146 produced by a flagellum), and  $\eta$  by  $10^{-3} \text{ pN}\mu\text{m}^{-2}$  (viscosity of water) [27]. Second, the boundary  
 147 and initial conditions are chosen, including the parameters determining the gait,  $c$  and  $\omega_i$ , and the  
 148 initial velocities  $\mathbf{V}(t=0)$ ,  $\mathbf{\Omega}(t=0)$ , forces and positions  $\mathbf{r}_i$ ,  $\boldsymbol{\theta}$ . The equations are then solved for  
 149 the velocities and forces  $(\mathbf{V}, \mathbf{\Omega}, \mathbf{F}_i)$ ; these are in turn used to propagate the positions to the following  
 150 time step. A fixed time step was used. The method of quaternions was used to resolve singularities  
 151 at  $\theta_2 = \pm\pi/2$  [34] (see also [27]).



| $\varphi_1$      | <b>Pronk</b>                                                       | <b>Trot</b>                                                      | <b>Gallop (CW)</b>                                 | <b>Gallop (CCW)</b>                          | <b>Bound</b>                                                     | <b>CR</b>                                |
|------------------|--------------------------------------------------------------------|------------------------------------------------------------------|----------------------------------------------------|----------------------------------------------|------------------------------------------------------------------|------------------------------------------|
| 0                | $(\mathbf{0}, 0, 0, 0)$                                            | $(\mathbf{0}, \pi, 0, \pi)$                                      | $(\mathbf{0}, \frac{\pi}{2}, \pi, \frac{3}{2}\pi)$ | $(\frac{3}{2}\pi, \pi, \frac{\pi}{2}, 0)$    | $(\mathbf{0}, 0, \pi, \pi)$                                      | $(\mathbf{0}, -, 0, -)$                  |
| $\frac{\pi}{2}$  | $(\frac{\pi}{2}, \frac{\pi}{2}, \frac{\pi}{2}, \frac{\pi}{2})$     | $(\frac{\pi}{2}, \frac{3}{2}\pi, \frac{\pi}{2}, \frac{3}{2}\pi)$ | $(\frac{\pi}{2}, \pi, \frac{3}{2}\pi, 2\pi)$       | $(2\pi, \frac{3}{2}\pi, \pi, \frac{\pi}{2})$ | $(\frac{\pi}{2}, \frac{\pi}{2}, \frac{3}{2}\pi, \frac{3}{2}\pi)$ | $(\frac{\pi}{2}, -, \frac{\pi}{2}, -)$   |
| $\pi$            | $(\pi, \pi, \pi, \pi)$                                             | $(\pi, 2\pi, \pi, 2\pi)$                                         | $(\pi, \frac{3}{2}\pi, 2\pi, \frac{\pi}{2})$       | $(\frac{\pi}{2}, 2\pi, \frac{3}{2}\pi, \pi)$ | $(\pi, \pi, 2\pi, 2\pi)$                                         | $(\pi, -, \pi, -)$                       |
| $\frac{3}{2}\pi$ | $(\frac{3}{2}\pi, \frac{3}{2}\pi, \frac{3}{2}\pi, \frac{3}{2}\pi)$ | $(\frac{3}{2}\pi, \frac{\pi}{2}, \frac{3}{2}\pi, \frac{\pi}{2})$ | $(\frac{3}{2}\pi, 2\pi, \frac{\pi}{2}, \pi)$       | $(\pi, \frac{\pi}{2}, 2\pi, \frac{3}{2}\pi)$ | $(\frac{3}{2}\pi, \frac{3}{2}\pi, \frac{\pi}{2}, \frac{\pi}{2})$ | $(\frac{3}{2}\pi, -, \frac{3}{2}\pi, -)$ |
| $2\pi$           | $(2\pi, 2\pi, 2\pi, 2\pi)$                                         | $(2\pi, \pi, 2\pi, \pi)$                                         | $(2\pi, \frac{\pi}{2}, \pi, \frac{3}{2}\pi)$       | $(\frac{3}{2}\pi, \pi, \frac{\pi}{2}, 2\pi)$ | $(2\pi, 2\pi, \pi, \pi)$                                         | $(2\pi, -, 2\pi, -)$                     |

TABLE I. List of the corresponding phase relationships for each of the tested quadriflagellate gaits, relative to the phase of flagellum 1 ( $\varphi_1$ ). The final column corresponds to the two-flagella case, which resembles the in-phase breaststroke of *Chlamydomonas reinhardtii* (CR).

### III. FLUID FLOWS

We used the above model to explore 4 distinct gaits of quadriflagellate self-propulsion, namely pronk, trot, bound and gallop. We assume a fixed geometry:  $a_0 = 0.7, a_{1-4} = 0.05, h = 1.3, \ell = 1, R = 0.6$  and  $\beta_{1-4} = 0.3$ , and only vary the gait - via the flagellar phases. Table 1 summarises the phase relationships between the four flagella in each of the different gaits (see also Supplementary videos 1). We considered two variants of the gallop gait, clockwise, or respectively counter-clockwise.

With reference to biological microswimmers, the pronk, trot, and gallop gaits are adopted routinely by different quadriflagellate species [7, 35]. Meanwhile the bound gait has only been observed occasionally, including in quadriflagellate zygotes of *C. reinhardtii* immediately after mating and cell-cell fusion [7].

As the model quadriflagellate swims, it displaces the surrounding fluid and exerts stresses that induce specific flow patterns. The instantaneous fluid flow velocity field  $\mathbf{u}(\mathbf{r}, t)$  can be calculated from (7) as

$$\mathbf{u}(\mathbf{r}, t_k) = \sum_{j=0}^4 \mathbf{G}(\mathbf{r} - \mathbf{r}_j(t_k)) \cdot \mathbf{F}_j(t_k) \quad (12)$$

by superimposing the 5 stokeslet fields located at the positions  $\mathbf{r}_j(t_k)$ , obtained by solving (8)-(10) at each time step  $t_k = k \Delta t$ . Beat-cycle averages can be derived by calculating

$$\bar{\mathbf{u}}(\mathbf{r}) = \frac{1}{N} \sum_{k=1}^N \mathbf{u}(\mathbf{r}, t_k), \quad (13)$$

where  $N = (f \Delta t)^{-1}$  is the number of time steps in a beat cycle.

The resulting flow field is three-dimensional and characterised by gait-dependent flow features. Fig. 2 shows the evolution of the velocity vector field in the fluid at five different stages of the beat cycle, for four distinct gaits. Since the tilt angle  $\beta \neq 0$  (indicating a non-planar tilt angle for all four flagella), there is an intrinsic chirality for all gaits. Here we have chosen  $\beta_{1-4} = 0.3$  based on experimental measurements obtained from *C. reinhardtii* [27] (similar measurements have not yet been obtained for quadriflagellate species); this parameter can be easily changed. For gaits exhibiting a high-degree of rotational symmetry, such as the pronk or trot, the flow field is highly symmetrical with respect to the body axis, whereas a net asymmetry is observed in the flow patterns ensuing from bound and gallop gaits. In the CW-gallop, a small vortex can also be seen to propagate in the clockwise sense. The flow fields also display novel flow features not seen around standard pushers, pullers or squirmers (see Supplementary videos 2-5).

The periodic alternation between power and recovery strokes leads to characteristic oscillatory flow patterns in the far-field (Fig. 3a). During the recovery stroke phase of each beat cycle, the flow field is that typical of a pusher swimmer - the fluid is pushed out from the sides, and drawn inwards from

185 above and below, while the pattern typical of a puller swimmer is observed during the power stroke.  
186 A similarly time-varying, oscillatory flow pattern has also been observed previously in simulations of  
187 a planar 2-flagella swimmer [36]. Moreover, the time-averaged flow fields display the characteristic  
188 profile of a puller swimmer, similar to that of the biflagellate *Chlamydomonas*. For brevity, only the  
189 trot flow field is shown in Fig. 3b,c. For all gaits, the cycle-averaged flow field displays a stagnation  
190 point in front of the flagellar orbits, again similar to the biflagellate case.

#### 191 IV. SWIMMING SPEED AND ROTATION

192 Flagellated algae, like several other swimming microorganisms, assume superhelical swimming tra-  
193 jectories. Superhelices are three-dimensional curves characterised by small-scale, fast swirls modulated  
194 by a larger-scale, slow helix. Such trajectories have been identified as the general solutions to the swim-  
195 ming problem at low Reynolds numbers [37]. Superhelices have been observed in sperm swimming  
196 [38] and in biaxial self-propelled particles under external torques [39].

197 Superhelical motion results from two concurrent rotations around two perpendicular axes. In our  
198 previous study on biflagellate swimmers, we showed that the superhelical trajectories typical of *C.*  
199 *rehinardtii* can be reproduced by a three-dimensional 3-bead model with non-planar beat dynamics  
200 and a small ( $> 1\%$ ) asymmetry in the forces driving the individual flagella. The bilateral asymmetry  
201 occurs simultaneously with a persistent axial rotation. While swimming forward with velocity  $\mathbf{V}$ ,  
202 the alga rotates around its body axis with angular velocity  $\mathbf{\Omega}$ . This rotation results from the non-  
203 planarity of the flagellar beat, which generates a net torque. Thus, fast swirls arise as a consequence  
204 of the alternation of non-planar power and recovery strokes which make up the full cycle of a typical  
205 flagellar beat. On the other hand, the large-scale helical character of the trajectories is the result of  
206 the asymmetric motion of the two flagella [27].

207 The free-swimming trajectories induced by the 5-bead swimmer model according to (9)-(10) are  
208 also superhelical (see Fig. 4). We introduce an orbital tilt  $\beta_i = 0.3$  to allow for beat non-planarity.  
209 Different gaits are implemented according to Table 1, by imposing an initial condition on the phases  
210  $\varphi_i^{(k)}(t = 0)$ , with  $k = \text{pronk, trot, gallop, bound, half-trot}$ , and  $i = 1 - 4$ .

211 We found that the average net linear and rotational velocities achieved by the model swimmer in  
212 different gaits vary considerably. For a fixed body geometry and  $\beta_i = 0.3$  for the single-flagellum  
213 tilt angle, Fig 4 shows the angular velocity  $\Omega$  and the forward speed  $V_z$  obtained in simulations for  
214 each of the gaits we tested. Average net speed was calculated by averaging over 20 beat cycles, with  
215 100 time steps per beat cycle. We observed that cells undergoing more symmetric gaits such as the  
216 biflagellate breaststroke (CR), and the quadriflagellate pronk and trot, proceed smoothly forward  
217 along perfectly straight trajectories. Meanwhile more bilaterally-asymmetric gaits such as the bound  
218 and gallop produce more curved trajectories, where the overall axis-of-progression of the superhelices  
219 are tilted. In the case of the gallop, the sense of gait rotation also dictates the overall helix tilt  
220 direction.

221 We further evaluated the rotation-translation coupling for the different gaits, and compared their  
222 swimming performance against our two-flagella reference - modelled on *Chlamydomonas* (CR). The  
223 ‘trot’ gait produced the fastest linear progression as well as the fastest angular progression. All other  
224 quadriflagellate gaits result in largely similar linear speeds, but segregated in terms of angular rotation  
225 speed (Figure 4b), all falling between 1 – 2 times that for the biflagellate CR.

226 These gait-dependent linear swimming speeds are consistent with the available data, in which the  
227 trot gait proceeds at  $408 \mu\text{m/s}$ , much faster than the pronk at  $126 \mu\text{m/s}$ , and gallop at  $127 \mu\text{m/s}$   
228 [10], and several times faster than that of CR at  $\sim 90 \mu\text{m/s}$  [40, 41]. Due to technical limitations in  
229 visualising the free-swimming trajectories in 3D, experimental estimates of the axial rotation speeds  
230 of the quadriflagellate species are not yet available. Our results are in broad agreement with mea-  
231 surements using an upscaled robophysical model in which the four flagella are actuated according  
232 to different gaits. In this case the mechanical flagella are configured relative to the cell body axis  
233 without tilt ( $\beta = 0$ ). The robot experiments (Fig. 1B) revealed a similarly strong dependence of both  
234 within-cycle and time-averaged swimming speed on gait dynamics, with the trot out-competing the

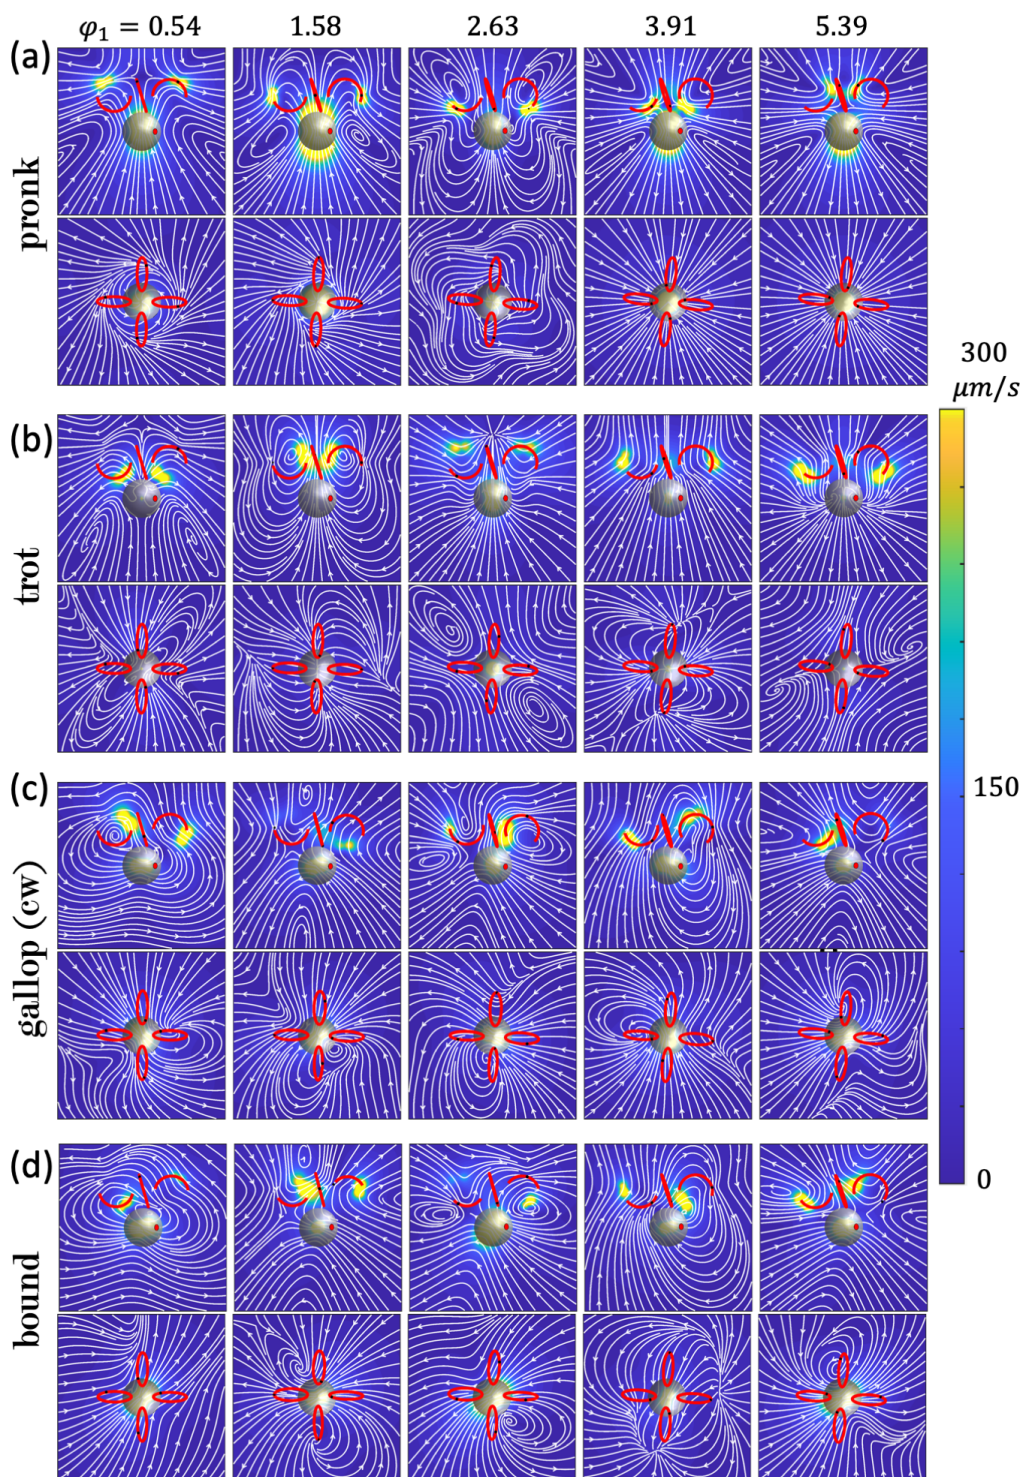

FIG. 2. Time dependent flow fields around a quadriflagellate microswimmer performing four distinct gaits (a) pronk, (b) trot, (c) gallop (CW), and (d) bound, in each case as observed in horizontal slices in the  $xz$  (side-view) and  $xy$  (top-view) profiles (B).



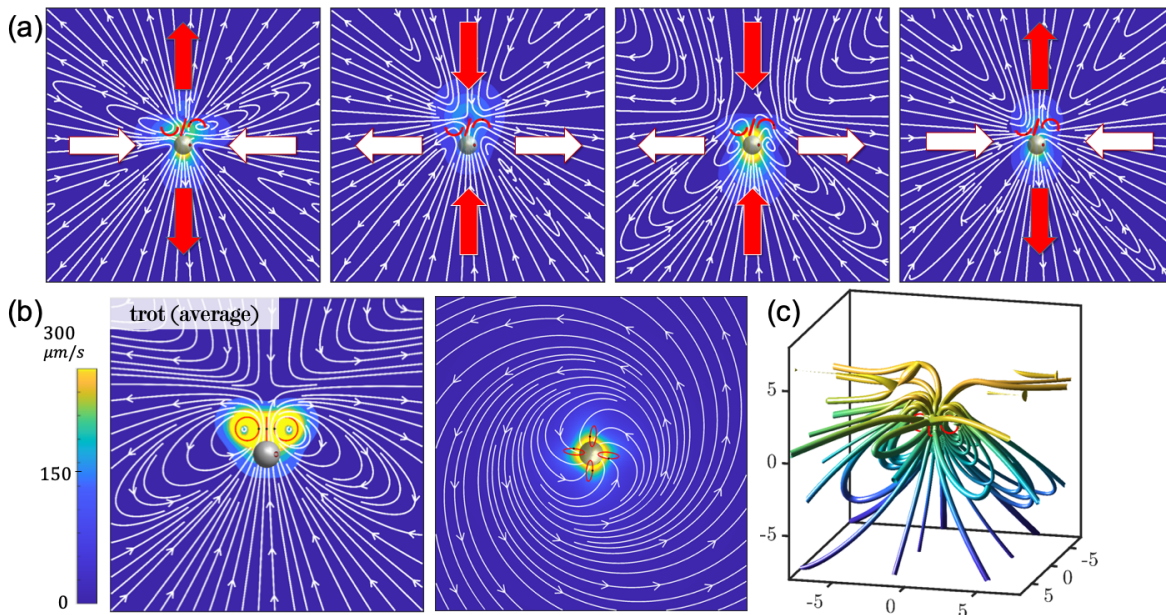

FIG. 3. (a) Far-field flow patterns for the trot gait alternates between pusher and puller flow fields over the course of a complete beat cycle. For the trot gait, the time-averaged flow fields are viewed from the side and top (b), together with a 3D rendering (c). (Note: (c) is plotted in computational units.)

235 remaining gaits [10]. A significant difference between the two variants on the gallop (either CW or  
 236 CCW) was also observed when the appendages are attached in a parallel configuration relative to the  
 237 body, this introduces a chirality similar to that present in our model.

238 The performance differences achieved between the gaits can be understood by examining the relative  
 239 displacement achieved *within* each beat cycle (Fig. 4c). Here, displacement is measured in  
 240 units of body-lengths/cycle relative to the start position at the beginning of each prospective power  
 241 stroke of the first (reference) flagellum ( $\varphi_1$ ). We observed that the pronk gait achieved the largest  
 242 positive displacement (forward swimming) during the power stroke, but this progress is negated by  
 243 a similarly large negative displacement (background) during the recovery stroke. Meanwhile in the  
 244 trot gait, there is always at least one pair of flagella executing a power stroke at all times, leading to  
 245 a largely monotonic displacement curve (always forwards), and ultimately the greatest net per-cycle  
 246 progression. These observations are again in good agreement with the equivalent scenarios measured  
 247 in the roboflagellate (see for example [10], Fig. 8).

248 We briefly compare the hydrodynamic efficiencies of the different gaits. We evaluate swimming  
 249 efficiency using the definition introduced by Lighthill [42, 43], where the power generated by the  
 250 flagella averaged over a single beat cycle  $\bar{P}$  is compared to the external power needed to maintain a  
 251 rigid sphere in uniform motion with velocity  $\bar{V}$ :

$$252 \quad \varepsilon = \frac{6\pi\eta a_0 \bar{V}^2}{\bar{P}} = \frac{6\pi\eta a_0 \bar{V}^2}{\langle \sum_{i=0}^4 \mathbf{F}_i \cdot \dot{\mathbf{r}}_i \rangle} = \frac{6\pi\eta a_0 \bar{V}^2}{\langle \mathbf{F}_0 \cdot \mathbf{V} + \sum_{i=1}^4 F_t^{(i)} \dot{\varphi}_i R \rangle} \quad (14)$$

253 where  $\langle \cdot \rangle$  denotes a time-average. Compared to the biflagellate case (CR), where  $\varepsilon_{\text{CR}} = 0.06$ , we find  
 254  $\varepsilon_{\text{gallop (ccw)}} = 0.07$ ,  $\varepsilon_{\text{bound}} = 0.09$ ,  $\varepsilon_{\text{gallop (cw)}} = 0.10$ ,  $\varepsilon_{\text{pronk}} = 0.09$  and  $\varepsilon_{\text{trot}} = 0.13$ .

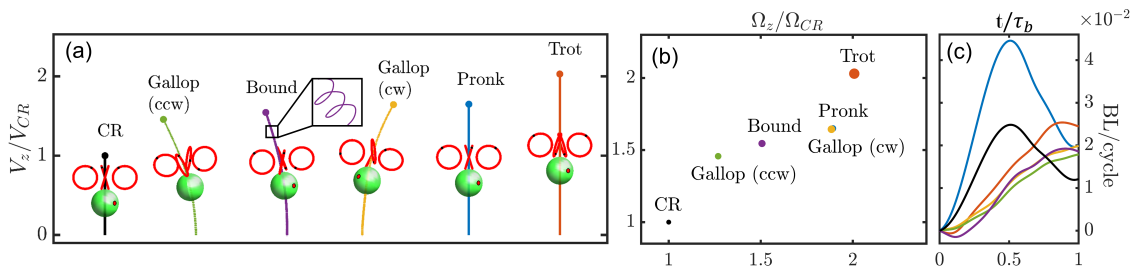

FIG. 4. (a) Similar to a biflagellate (CR) executing an in-phase breaststroke, a model quadriflagellate microswimmer traces out assorted superhelical trajectories that depend on gait. Inset: fast in-beat swirls occurring on the timescale of ciliary beating. (b) Scatter plot of the translational and rotational speeds of the different gaits. Marker size is scaled by the respective Lighthill efficiency  $\varepsilon$  of each gait (see text). (c) The within-beat cycle displacement (relative to the starting position) is plotted against the scaled time  $t/\tau_b$ , where  $\tau_b$  is the beat period of the corresponding gait.

255

## V. CONFIGURATIONAL ASYMMETRIES

256

In the previous section, we observed that inherently asymmetric gaits such as the pronk or bound can accentuate asymmetries in the free-swimming trajectories. Further asymmetries can also arise from different sources, including in the respective beat dynamics of the four flagella, or in the geometry of the scaffold.

257

One possibility is to introduce an asymmetry in the bead rotation (i.e. flagellar beat) frequencies, for example between opposite pairs of flagella. In this scenario however, the phase differences between flagella in a given gait is not preserved. Just as in the biflagellate case, it is likely that real cells tune the balance of flagellar beating to control the overall trajectory heading, particularly in the context of symmetry-breaking and tactic behaviours [27]. A detailed investigation is beyond the scope of the present study.

258

An alternative is to introduce a geometric asymmetry so that the four flagella beat planes no longer obey the same tilt angle. In the example configuration shown in Fig. 5a,b, the tilt angle  $\beta_{(ij)}$ , each pair of opposite flagellar beads  $i, j$  move on orbits tilted by an angle  $\beta_{(ij)}$ , with  $\beta_{(13)} \neq \beta_{(24)}$ . This quasi-rotational symmetry has been documented in the flagellar apparatuses of some species of green algae [44]. This configuration further breaks axial symmetry and again induces superhelical trajectories in all gaits, including in the previously symmetrical gaits such as the pronk and trot (Figure 5c).

259

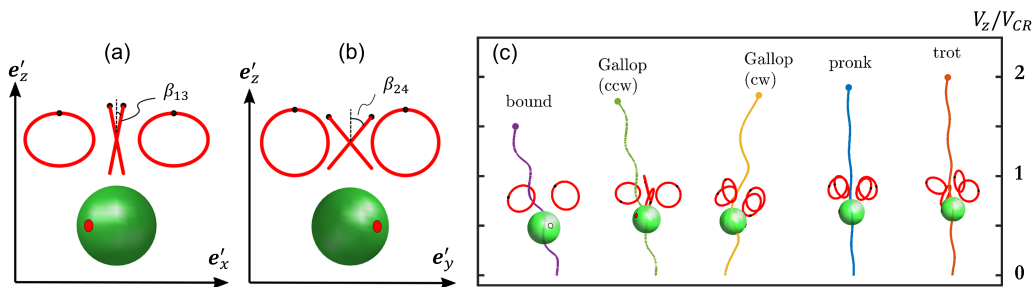

FIG. 5. Further geometric asymmetries can also influence the overall symmetry of the trajectory. For instance we can vary the tilt angle so that opposite flagella pairs have the same tilt  $\beta_{(ij)}$ , (a)  $\beta_1 = \beta_3 = \beta_{(13)}$ , (b)  $\beta_2 = \beta_4 = \beta_{(24)}$ . (c) Sample trajectories for the different gaits, with  $\beta_{(13)} = 0.3$  and  $\beta_{(24)} = 0.25$ .

272

## VI. CLEARANCE RATE, FEEDING FLOWS, AND PREDATION

273 When considering the ecological or evolutionary drivers of gait diversification in flagellates, it is  
 274 important to recognise that flagellar actuation strategies that are optimized for swimming may not  
 275 necessarily be optimal for other important physiological processes, such as feeding [16, 45]. Unlike  
 276 photoautotrophic algae, some marine flagellates are obligate heterotrophs [46], meaning that they  
 277 must supplement their diet by phagocytosing bacteria or other small prey organisms - a process that  
 278 may be significantly influenced by the precise coordination patterns of the flagella. In this section  
 279 we explore the functional relationships between gait and induced near-field flow architecture in the  
 280 context of feeding, prey handling and possible evasion from predators.

281 We quantify the clearance rate of a feeding microorganism as the equivalent volume of water from  
 282 which the micro-swimmer removes all feed or prey particles per unit time. In suspension-feeding  
 283 microorganisms, this can be modelled by the filtration rate at which water is passed through a well-  
 284 defined filtering surface [47]. Here, we model the catchment area of the feeding filtration with a  
 285 two-dimensional disk  $\Sigma$  of radius  $\rho$  located at a distance  $H$  in front of the cell body. The clearance  
 286 rate is the volumetric flow rate  $Q_{\Sigma}$  across the disk  $\Sigma$ :

$$287 \quad Q_{\Sigma}(t) = \oint_{\Sigma} \mathbf{u}(\mathbf{r}, t) \cdot d\mathbf{\Sigma} = \int_0^{\rho} r dr \int_0^{2\pi} d\theta \mathbf{u}(\mathbf{r}, t) \cdot \mathbf{e}'_z \quad (15)$$

288 The discretised version of (15) is  $\pi\rho^2 \langle \sum_i u(x_i, y_i, H) \cdot \mathbf{e}'_z \rangle$ , where the index  $i$  indicates the  $i$ -th time  
 289 step and the sum is over an entire beat cycle. Here we chose  $\rho = a_0$ , the cell radius.

290 The average clearance rate over the entire beat cycle  $\bar{Q} = \frac{1}{T_b} \int_0^{T_b} Q_{\Sigma}(t) dt$  can be used to quantify  
 291 the overall effect of the cell on the region described by  $\Sigma$  (Fig. 6a).  $\bar{Q} > 0$  for all values of  $H$ , and for  
 292 all gaits, showing that flagellar motion has the net effect of pushing fluid away from the front part of  
 293 the cell body. However, the clearance rate has a maximum at  $H \sim 5.5\mu\text{m}$ , corresponding to where  $\Sigma$   
 294 intersects the centers of the flagellar orbits.

295 Upon analysing how the time-dependent clearance rate  $Q_{\Sigma}$  varies throughout the beat cycle (see  
 296 Fig. 6a), we observe that if the disk is located between the cell body and the tip of the flagellar orbit,  
 297  $Q_{\Sigma}$  assumes negative values (corresponding to fluid being pulled towards the cell body) only during  
 298 the recovery stroke for the biflagellate and pronk gaits. Conversely, if the disk is placed in front of the

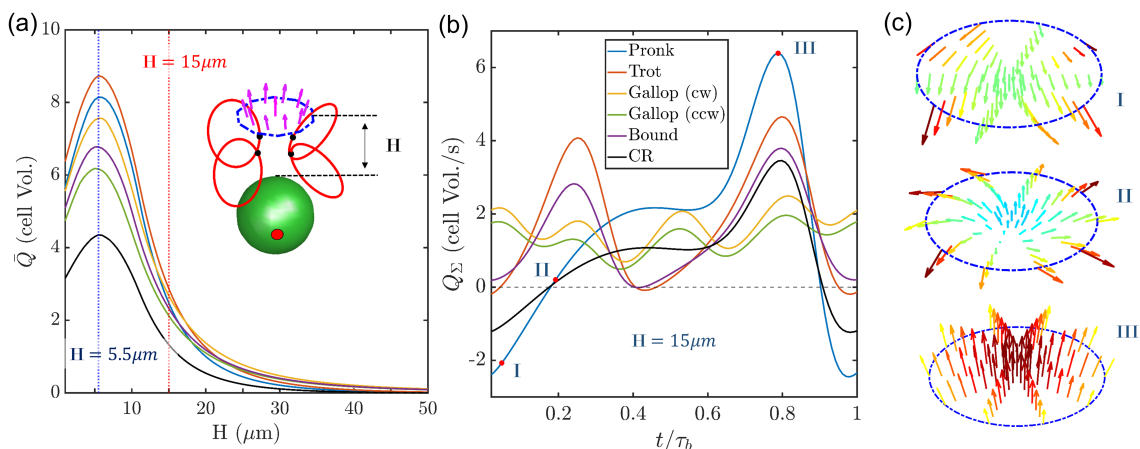

FIG. 6. (a) Period-averaged clearance rate as a function of distance from the cell body. Inset: configuration showing the five beads and relative placement of a clearance disk. (b) Within-beat cycle changes in clearance rate again depends on gait. (c) For  $H = 15$ , snapshots highlight the reversal of flow direction over one cycle for the pronk gait.



299 stagnation point, all the gaits except for the two gallops display  $Q_\Sigma < 0$  during the power stroke, and  
 300 the beat cycle average is smaller, signifying that a smaller volume of fluid is pushed away from the  
 301 cell body. In this case, differences between gaits are also more evident, with the pronk gait showing  
 302 the highest negative clearance rate (see Fig. 6b).

303 The in-beat differences in  $Q_\Sigma$  suggest that some gaits can be used to effectively pull particles  
 304 suspended in the fluid towards the stagnation point, then letting them approach the front of the cell  
 305 body either by triggering a "stop" response or by exploiting the coasting effect achieved during the  
 306  $Q_\Sigma \leq 0$  phase of the beat. The spatial arrangement of flagella forces around a cell is known to greatly  
 307 influence the statistics of particle entrainment and near-wall contact probabilities [48].

308  
 309 Many flagellates are themselves the prey of other species. The flow disturbances created by any  
 310 swimmer necessarily dictate the likelihood that they will be perceived by an approaching predator.  
 311 Finally, we ask whether gait can also influence the hydrodynamic perception field of quadriflagellates,  
 312 and thereby facilitate quiet-swimming [49].

313 Fig. 7 shows the spatial decay of the components of the average fluid velocity  $\bar{\mathbf{u}}(\mathbf{r})$ , obtained by  
 314 calculating (12) from the solutions  $\mathbf{r}_i(t)$ , and averaging it over a complete beat cycle, with a time step  
 315  $\Delta t = 0.01$ . In the far-field, the flows broadly obey the usual stresslet decay ( $\sim r^{-2}$ ) corresponding  
 316 to the simple flow field generated by two oppositely directed stokeslets. However it is clear that  
 317 flow field attenuation is gait-dependent, suggesting that organisms can also manipulate streamlines  
 318 by changing their swimming gait to avoid predators. For front-mounted swimmers, the difference is  
 319 most pronounced in the z-direction, aligned with the cell's anterior-posterior axis, which is likely the  
 320 direction most sensitive to approaching predators. A rotary gallop gait with a chirality counter to the  
 321 sense of the individual tilt angle of the flagella, also appears to generate the greatest flow disturbances  
 322 (e.g. compare the CW with CCW gallop).

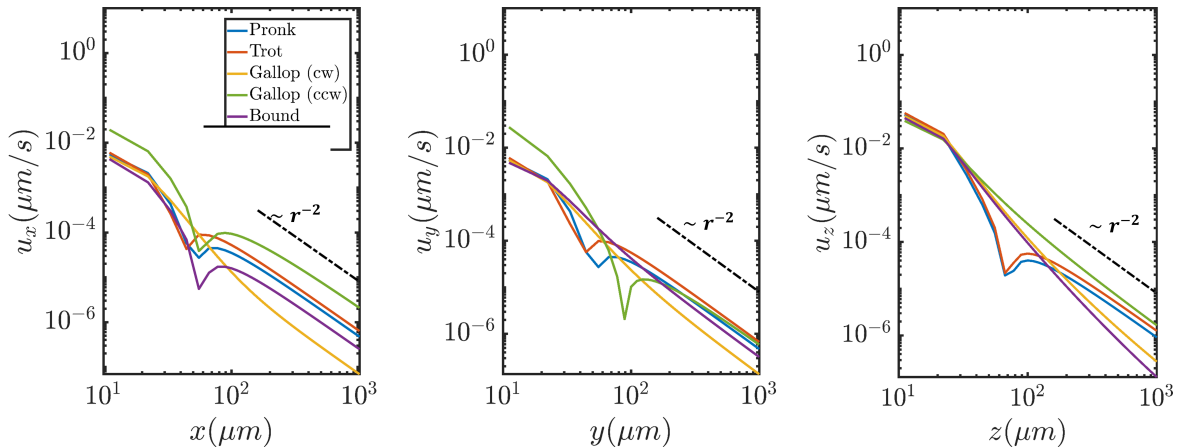

FIG. 7. Components of the average fluid flow velocity  $\mathbf{u}(\mathbf{r})$  evaluated for each of the different gaits.

323

## VII. CONCLUDING REMARKS

324 In summary, we have presented a novel hydrodynamic model of a prototypical quadriflagellate  
 325 microswimmer, in which flagellar dynamics are modelled as small beads rotating along circular orbits.  
 326 By prescribing the action, particularly, the order of actuation of these four flagella, we systematically  
 327 compared the consequences of gait on the induced flow architecture, free-swimming dynamics and  
 328 efficiency, as well as for the manipulation of feeding flows. These quantitative comparisons were made  
 329 against physical measures of flow features including swimming speed, angular rotation, swimming  
 330 efficiency, clearance rate etc, with particular emphasis on the three-dimensional nature of these flow

331 disturbances. Our approach allowed us to visualise the detailed near and far-field flow patterns around  
332 individual swimmers, and also to resolve how these highly-dynamic patterns evolve over time during  
333 the course of a stereotypical beat cycle.

334 So far, we have focused solely on gaits that are stable in time, in which the swimmer dynamics  
335 are prescribed. In reality, long-time tracking of single flagellates has shown that gait and behaviour  
336 are both highly-dynamic, exhibiting stochastic and reversible fluctuations between distinct gaits or  
337 swimming modes [20]. Future work should seek to account for the statistics of such gait transitions as  
338 measured from experimental data to investigate their influence on the overall morphology of simulated  
339 trajectories.

340 While it is not yet feasible/possible to directly manipulate the gaits of live cells, our work suggests  
341 novel strategies for gait-based control of swimming efficiency in systems of artificial microswimmers.  
342 Understanding the detailed three-dimensional distribution of stresses and the time-dependence of  
343 induced flows, can help inform designs of artificial devices capable of spatiotemporal flow manipulation  
344 at the microscale [50, 51].

345 Previous experimental studies have already demonstrated the range of possible swimming and for-  
346 aging activities induced by diverse flagellates with varying numbers, patterns, arrangements and types  
347 (e.g. hairy vs naked) of flagella [7, 52]. Our present work reveals that even for organisms exhibiting  
348 *identical* flagella number, morphology and beat pattern, distinct propulsion strategies and speeds can  
349 still emerge - in other words, gait alone can strongly dictate a cell's swimming dynamics. This is  
350 consistent both with biological measurements from different quadriflagellate species, and also with  
351 laboratory measurements conducted with an up-scaled robophysical model [10]. The 'trot' gait in  
352 particular, was found to be the most efficient of all quadriflagellate gaits. Other gaits all achieved  
353 linear and angular speeds that were faster than that of the biflagellate model, to different degrees.

354 From an eco-evolutionary perspective, the existence of distinct gaits of self-propulsion in mor-  
355 phologically comparable species is consistent with the notion that many flagellates are mixotrophic,  
356 meaning that they must acquire resources through consuming prey organisms or particulate matter in  
357 the medium, in addition to directed swimming and photosynthesis. These different flagellar actuation  
358 gaits may have emerged over the course of evolution in response to adaptation and survival in different  
359 habitats, to address a fundamental trade-off between swimming and other key processes not directly  
360 motility - e.g. feeding and stealthy living. The distinct spatiotemporal flow signatures produced by  
361 each of the gaits also suggests a concrete route by which organisms can manipulate their near-field  
362 flows in order to accommodate other specialised motor actions, such as feeding or prey-detection by  
363 other sensory appendages [35, 53].

## 364 ACKNOWLEDGMENTS

365 This work received funding from the European Research Council (ERC) under the European Union's  
366 Horizon 2020 research and innovation programme (grant agreement No 853560 *EvoMotion*, to KYW).

- 
- 367 [1] R. E. Goldstein, M. Polin, and I. Tuval, Noise and Synchronization in Pairs of Beating Eukaryotic Flagella,  
368 *Physical Review Letters* **103**, 168103 (2009).  
369 [2] H. Guo, Y. Man, K. Y. Wan, and E. Kanso, Intracellular coupling modulates biflagellar synchrony, *Journal*  
370 *of The Royal Society Interface* **18**, 20200660 (2021).  
371 [3] M. Melkonian, Structural and evolutionary aspects of the flagellar apparatus in green algae and land  
372 plants, *TAXON* **31**, 255 (1982).  
373 [4] S. Sym and M. Kawachi, Swimming behaviour in the genus *pyramimonas*, *Phycologia* **36**, 110 (1997).  
374 [5] N. Daugbjerg, H. J. Marchant, and H. A. Thomsen, Life history stages of *Pyramimonas tychotreta*  
375 (*Prasinophyceae*, *Chlorophyta*), a marine flagellate from the Ross Sea, Antarctica, *Phycological Research*  
376 **48**, 199 (2000).  
377 [6] M. Bornens, Cell polarity: having and making sense of direction—on the evolutionary significance of the  
378 primary cilium/centrosome organ in Metazoa, *Open Biology* **8**, 180052 (2018).

- [7] K. Y. Wan and R. E. Goldstein, Coordinated beating of algal flagella is mediated by basal coupling, *Proceedings of the National Academy of Sciences of the United States of America* **113**, E2784 (2016).
- [8] K. Y. Wan, Synchrony and symmetry-breaking in active flagellar coordination, *Philosophical Transactions of the Royal Society B-biological Sciences* **375**, 20190393 (2020).
- [9] D. F. Hoyt and C. R. Taylor, Gait and the energetics of locomotion in horses, *Nature* **292**, 239 (1981).
- [10] K. Diaz, T. L. Robinson, Y. O. Aydin, E. Aydin, D. I. Goldman, and K. Y. Wan, A minimal robophysical model of quadriflagellate self-propulsion, *Bioinspiration & Biomimetics* **16**, 066001 (2021).
- [11] E. M. Purcell, Life at low Reynolds number, *American Journal of Physics* **45**, 3 (1977).
- [12] A. Najafi and R. Zargar, Two-sphere low-Reynolds-number propeller, *Phys. Rev. E* **81**, 067301 (2010).
- [13] J. E. Avron, O. Kenneth, and D. H. Oaknin, Pushmepullyou: an efficient micro-swimmer, *New Journal of Physics* **7**, 234 (2005).
- [14] M. S. Rizvi, A. Farutin, and C. Misbah, Size and shape affect swimming of a triangular bead-spring microswimmer, *Physical Review E* **98**, 043104 (2018).
- [15] M. A. Jalali, M.-R. Alam, and S. Mousavi, Versatile low-Reynolds-number swimmer with three-dimensional maneuverability, *Physical Review E* **90**, 053006 (2014).
- [16] D. Tam and A. E. Hosoi, Optimal feeding and swimming gaits of biflagellated organisms, *Proceedings of the National Academy of Sciences of the United States of America* **108**, 1001 (2011).
- [17] M. Leoni, J. Kotar, B. Bassetti, P. Cicuta, and M. C. Lagomarsino, A basic swimmer at low Reynolds number, *Soft Matter* **5**, 472 (2009).
- [18] F. Box, E. Han, C. R. Tipton, and T. Mullin, On the motion of linked spheres in a Stokes flow, *Experiments in Fluids* **58**, 29 (2017).
- [19] G. Grosjean, M. Hubert, G. Lagubeau, and N. Vandewalle, Realization of the Najafi-Golestanian microswimmer, *Physical Review E* **94**, 021101 (2016).
- [20] S. A. Bentley, V. Anagnostidis, H. L. Schlogelhofer, F. Gielen, and K. Y. Wan, *Phenotyping single-cell motility in microfluidic confinement*, preprint (Biophysics, 2021).
- [21] A. C. H. Tsang, A. T. Lam, and I. H. Riedel-Kruse, Polygonal motion and adaptable phototaxis via flagellar beat switching in the microswimmer euglena gracilis, *Nature Physics* **14**, 1216 (2018).
- [22] K. Bente, S. Mohammadnejad, M. A. Charsooghi, F. Bachmann, A. Codutti, C. T. Lefèvre, S. Klumpp, and D. Faivre, High-speed motility originates from cooperatively pushing and pulling flagella bundles in bilophotrichous bacteria, *eLife* **9**, e47551 (2020).
- [23] A. Vilfan and F. Jülicher, Hydrodynamic Flow Patterns and Synchronization of Beating Cilia, *Physical Review Letters* **96**, 058102 (2006).
- [24] N. Bruot and P. Cicuta, Realizing the Physics of Motile Cilia Synchronization with Driven Colloids, *Annual Review of Condensed Matter Physics* **7**, 323 (2016).
- [25] D. R. Brumley, M. Polin, T. J. Pedley, and R. E. Goldstein, Hydrodynamic Synchronization and Metachronal Waves on the Surface of the Colonial Alga *Volvox carteri*, *Physical Review Letters* **109**, 268102 (2012).
- [26] R. R. Bennett and R. Golestanian, Emergent Run-and-Tumble Behavior in a Simple Model of *Chlamydomonas* with Intrinsic Noise, *Physical Review Letters* **110**, 148102 (2013).
- [27] D. Cortese and K. Y. Wan, Control of helical navigation by three-dimensional flagellar beating, *Physical Review Letters* **126**, 088003 (2021).
- [28] K. Drescher, R. E. Goldstein, N. Michel, M. Polin, and I. Tuval, Direct Measurement of the Flow Field around Swimming Microorganisms, *Physical Review Letters* **105**, 168101 (2010).
- [29] Z. Teff, Z. Priel, and L. A. Gheber, The Forces Applied by Cilia Depend Linearly on Their Frequency Due to Constant Geometry of the Effective Stroke, *Biophysical Journal* **94**, 298 (2008).
- [30] S. Hanasoge, P. J. Hesketh, and A. Alexeev, Metachronal Actuation of Microscale Magnetic Artificial Cilia, *ACS Applied Materials & Interfaces* **12**, 46963 (2020).
- [31] J. S. Guasto, K. A. Johnson, and J. P. Gollub, Oscillatory Flows Induced by Microorganisms Swimming in Two Dimensions, *Physical Review Letters* **105**, 168102 (2010).
- [32] N. Uchida and R. Golestanian, Generic Conditions for Hydrodynamic Synchronization, *Physical Review Letters* **106**, 058104 (2011).
- [33] W. Liao and E. Lauga, Energetics of synchronization for model flagella and cilia, *Physical Review E* **103**, 042419 (2021).
- [34] M. Boyle, The Integration of Angular Velocity, *Adv. Appl. Clifford Algebras* **27**, 2345 (2017).
- [35] K. Y. Wan and G. Jékely, Origins of eukaryotic excitability, <https://arxiv.org/abs/2007.13388> (2020).
- [36] G. S. Klindt and B. M. Friedrich, Flagellar swimmers oscillate between pusher- and puller-type swimming, *Physical Review E* **92**, 063019 (2015).
- [37] M. Rossi, G. Cicconofri, A. Beran, G. Noselli, and A. DeSimone, Kinematics of flagellar swimming in *Euglena gracilis* : Helical trajectories and flagellar shapes, *Proceedings of the National Academy of*

- 438 [Sciences](#) **114**, 13085 (2017).
- 439 [38] B. M. Friedrich and F. Jülicher, Chemotaxis of sperm cells, [Proceedings of the National Academy of](#)  
440 [Sciences](#) **104**, 13256 (2007).
- 441 [39] R. Wittkowski and H. Löwen, Self-propelled Brownian spinning top: Dynamics of a biaxial swimmer at  
442 low Reynolds numbers, [Physical Review E](#) **85**, 021406 (2012).
- 443 [40] T. J. Racey, R. Hallett, and B. Nickel, A quasi-elastic light scattering and cinematographic investigation  
444 of motile *Chlamydomonas reinhardtii*, **35**, 15 (1981).
- 445 [41] V. Martinez, R. Besseling, O. Croze, J. Tailleur, M. Reufer, J. Schwarz-Linek, L. Wilson, M. Bees, and  
446 W. Poon, Differential Dynamic Microscopy: A High-Throughput Method for Characterizing the Motility  
447 of Microorganisms, [Biophysical Journal](#) **103**, 1637 (2012).
- 448 [42] M. Lighthill, On the squirming motion of nearly spherical deformable bodies through liquids at very small  
449 reynolds numbers, *Communications on pure and applied mathematics* **5**, 109 (1952).
- 450 [43] S. Michelin and E. Lauga, Optimal feeding is optimal swimming for all pécelet numbers, *Physics of Fluids*  
451 **23**, 101901 (2011).
- 452 [44] C. J. O’Kelly and G. L. Floyd, Flagellar apparatus absolute orientations and the phylogeny of the green  
453 algae, [Biosystems](#) **16**, 227 (1983).
- 454 [45] J. B. Kirkegaard and R. E. Goldstein, Filter-feeding, near-field flows, and the morphologies of colonial  
455 choanoflagellates, [Physical Review E](#) **94**, 052401 (2016).
- 456 [46] N. A. Bock, S. Charvet, J. Burns, Y. Gyaltsen, A. Rozenberg, S. Duhamel, and E. Kim, Experimental  
457 identification and in silico prediction of bacterivory in green algae, [The ISME Journal](#) **15**, 1987 (2021).
- 458 [47] M. Rode, G. Meucci, K. Seegert, T. Kiørboe, and A. Andersen, Effects of surface proximity and force  
459 orientation on the feeding flows of microorganisms on solid surfaces, [Physical Review Fluids](#) **5**, 123104  
460 (2020).
- 461 [48] A. J. T. M. Mathijssen, R. Jeanneret, and M. Polin, Universal entrainment mechanism controls contact  
462 times with motile cells, [Physical Review Fluids](#) **3**, 033103 (2018).
- 463 [49] A. Andersen, N. Wadhwa, and T. Kiørboe, Quiet swimming at low Reynolds number, [Physical Review E](#)  
464 **91**, 042712 (2015).
- 465 [50] X. Dong, G. Z. Lum, W. Hu, R. Zhang, Z. Ren, P. R. Onck, and M. Sitti, Bioinspired cilia arrays with  
466 programmable nonreciprocal motion and metachronal coordination, [Science Advances](#) **6**, eabc9323 (2020).
- 467 [51] C. L. van Oosten, C. W. M. Bastiaansen, and D. J. Broer, Printed artificial cilia from liquid-crystal  
468 network actuators modularly driven by light, [Nature Materials](#) **8**, 677 (2009).
- 469 [52] L. T. Nielsen and T. Kiørboe, Foraging trade-offs, flagellar arrangements, and flow architecture of plank-  
470 tonic protists, *Proceedings of the National Academy of Sciences* **118** (2021).
- 471 [53] J. Dölger, L. T. Nielsen, T. Kiørboe, and A. Andersen, Swimming and feeding of mixotrophic biflagellates,  
472 [Scientific Reports](#) **7**, 39892 (2017).

## 473 VIII. APPENDIX A

### 474 List of supplementary videos

- 475 • Video 1: Imposed bead dynamics corresponding to four quadriflagellate gaits (trot, pronk, gallop  
476 (cw), bound). Observe the movement of each flagella bead in a tilted plane ( $\beta \neq 0$ ).
- 477 • Videos 2-5: Near-field, three-dimensional flow fields (side view: x-z plane, and top view: x-y  
478 plane) induced by each quadriflagellate gait.
